# Supplementary material
Source: MDPI journal article supplement (https://www.mdpi.com/2079-9276/1/1/23)
Supplement: s2 [file s2]

## Sheet: Introduction
									GeRS-DeMo
									Institute for Sustainable Futures
									(Ge)ologic (R)esources (S)upply-(De)mand (Mo)del
									Steve Mohr - 2011
									http://www.isf.uts.edu.au/
									Introduction
				In these green boxes the following information is located:
				A background to the model.
				A brief description of the author, is presented
				The aims of the model, what it does and how it achieves it.
				The inputs that are required for the model are described in the green boxes below.
				As a guide to how the model can be utilised two example input sheets are provided.
									What is GeRS-DeMo?
				GeRS-DeMo - or Geologic Resource Supply - Demand Model estimates the demand, production (from mines or fields) and recycling
				of any geologic resource. Specifically, it can be used to predict the historic and future production, amount of recycling and demand of
				a metal, fossil fuel, or strategic mineral. It has been used by the author to successfully model coal (black and brown), oil (conventional,
				shale, natural bitumen/tar sand and extra heavy oil), gas (conventional, tight, coalbed methane, shale) phosphorus, lithium, gold, nickel,
				copper resources.
				The model has been successfully used on world, country and regional levels.
				The model is the perfect solution for any organisation, or researcher that wishes to forecaste the supply and demand of critical resources
									Model's history
				Steve Mohr created the model as part of his PhD investigating the supply of fossil fuels (coal, oil and gas) During the years 2007-2010.
				After completing the PhD, Steve used the model to project world phosphorus production (work in at the time at the University of
				Newcastle) under the supervision of Prof. Geoffrey M. Evans. Steve Mohr also used the model to project global lithium production
				while working at Monash University. As part of that work, Steve updated the model to include the addition of a recycling component.
				Also while working at Monash University, Steve Mohr working under Dr Gavin Mudd projected gold and nickel production from the
				Goldfield / Esperance region of Western Australia. In 2011 Steve began working at the Institute for Sustainable Futures and has worked
				with the Peak Minerals Cluster lead by Dr Damien Giurco to project black coal, lithium, iron ore, copper and gold production in
				Australia.
				The Institute for Sustainable Futures funded the development of the model into a formate that could be utilised by all people and
				organisations.
									How does GeRS-DeMo work?
				The model has three key components:
				production
				recycling
				demand
				A brief verbal description of each of these components will be presented
									How does GeRS-DeMo work? - Production from mines
				The production from mines component is determined by bringing online idealised mines throughout time, by inputting the URR (area
				under the production curve), initial and final mine sizes and lives, the model works to bring these idealised mines online and allows for
				interactions with the supply and demand. In particular, the supply and demand can cause mines to shut down earlier than expected (and
				restart again at a later date), increase or decrease the number of mines brought online in any given year, and cause the idealised mines to
				upgrade (double the maximum production).
				When a mine is brought online, it initially has a schedule as indicated:
				Over the course of a mines life its actual production may look like…
									How does GeRS-DeMo work? - Production from fields
				The production from fields component is determined by bringing online idealised fields throughout time, by inputting the URR (area
				under the production curve), fields are also combined into Oil and Gas Regions (OGREs). As shown in the figure fields ramp up to a
				maximum production, then at a certain point begins to exponentially declines. The URR of fields varies greatly with initial fields being
				relatively large to smaller fieldsizes. The rate of this change is controlled by powernum - see inputs below. All of the fields are assumed
				be proportional to the URR of the field, specifically, the maximum production of the field compared to the URR of the field are inputted
				in variable the URRtor0, and the point at which production begins to decline is determined by URRtoURRw.
				If sufficient quality data exists projections of individual oil and gas regions is recommended, but in places where this is not practical
				then input the number of OGREs and the rate constant that controls how quickly the size of the regions change from samll to large to small
				these inputs then are used to determine the size, of an individual region and when that region comes online, and the field model is
				used to project the production from this region.
				As with the Mines model, the supply and demand interaction can cause fields to be brought online earlier or later, it can prematurely
				shut down fields and restart them later, and it can bring an OGRE online earlier in order to meet strong demand.
									How does GeRS-DeMo work? - Recycle
				There is a recycling component in the model. This recycling works by the user inputting a fixed life of the products (it is assumed that
				all products have the same life expectancy. The initial and final rates of recycling expressed as a percentage are inputted into the model
				along with rate and time constants which cause determine when and how quickly the recycling rates change. For example if in the
				life of the product is 10, and the current recycling is 20% then 20% of the supply (production + recycle) 10 years ago is recycled and added
				to the supply of the resource in the current year.
				The formal mathematical equation for this description is shown in the ammendments section.
									How does GeRS-DeMo work? - demand
				Demand is assumed to be linked to population. Specifically the population is assumed to follow an assymetric S curve with minimum and
				maximum populations. The per capita demand is assumed to exponentially rise to a maximum level and thereafter plateau.
				Demand and supply both influence each other (unless inputs k1,…, k5 are set to 0)
				The graphs below show the PhD population assumption and per capita demand]
									Steve Mohr's Focus
				Steve Mohr's passion is in projecting the availability of critical resources, and working towards to creation of a truly sustainable world.
				Steve completed a mathematics and chemical engineering degree, with honours class one and university medal at the University of
				Newcastle. During this time Steve became passionate about resource modelling and decided to pursue the research by undertaking a
				PhD at the University of Newcastle
				Before joining the Institute, Steve worked under Prof. Geoffrey Evans at the University of Newcastle investigating future phosphorus
				production for the world. Steve also worked with Dr Gavin Mudd at Monash University as part of the Peak Minerals Cluster investigating
				world lithium supply and demand, as well as gold and nickel production in the Goldfield Esperance region of Western Australia.
				Steve is eager to continue projecting the supply and demand of critical resources.
									Disclaimers:
				Copyright 2011 Steve Mohr
				Permission is granted to generate projections using this model, provided a reference to the model is included. Please cite it as:
				Mohr 2011, Steve Mohr's PhD model, …
				If you chose to create a projection on your own please read the inputs section below and it is strongly recommended that you
				consult Steve Mohr's thesis for a detailed description of the modelling theory:
				http://www.theoildrum.com/node/6782
				If you choose to engage the Institute for Sustainable Futures (ISF) to create projection(s) of the resource(s) please contact the ISF via:
				Steve Mohr, steve.mohr@uts.edu.au, +61 2 9514 9041
				or Damien Giurco, Damien.Giurco@uts.edu.au, +61 2 9514 4978
				http://www.isf.uts.edu.au/
									Model - Warnings
				The model currently only works on Windows 32 bit, and excel 2007/2010; it does NOT work on excel 2003 or other operating systems
				If there is sufficient demand for the model to work in different platforms or older versions of excel I will fix the macro accordingly.
				The folder must be saved in a directory with no spaces in it, e.g. C:\Models\GeRS-DeMo is ok, but C:\not allowed\GeRS-DeMo is not
				Do NOT input new sheets or change the names of sheets etc. ONLY insert input values (The macro will likely fail otherwise).
				Macros must be enabled in order for the model to work
				The macro was written to enable researchers and organisations to utilise the power of the model.
				Every effort has been made to ensure that the model works in the manner stated, but some errors may exist
				If you do find an error, please email Steve Mohr at the Institute for Sustainable Futures
				steve.mohr@uts.edu.au
									Model - Introduction:
				This is Steve Mohr's PhD thesis model (with some minor changes that evolved after the PhD)
				The model allows you to project the supply (production and recycle) and demand of a geologic resource
				There are 2 major components, extraction by mines (Mine tab) and extraction by fields (Field tab)
				The Field extraction should only be used for things like oil or gas, with things like coal or copper etc use the Mine extraction
				There are 4 main inputs that need to be filled by the user namely: General_Info, Interactions, Mine and Field
				Once the inputs have been inserted into the model, simply click the run model button located at the top.
				This will create a folder with the outputs, as well as a summary excel file of the outputs
									General_Info
				In this tab there are two inputs:
				Scenario name: this is the name of the folder that will be created with all the outputs
				Units: this is the units of measure used for resource, and exists for graphical purposes
									Interaction
				The interaction tab has the inputs that govern the overall scenario
				These inputs are split into 5 categories:
					should be left as is
					Percapita demand
					Interaction between supply and demand.
					Population
					Recycling
									Mine - Necessary inputs
			Symbol	Term	Description
			NA	Continent	The relevant continent for the individual item, e.g. Asia
			NA	Country	The relevant country for the individual item, e.g. Australia
			NA	Region	The relevant region for the individual term, e.g. NSW
			NA	Mineral	The geological resource being examined e.g. Coal
			NA	Type	The subtype of resource e.g. Bituminous
			NA	Number	The number of the item, use 1, 2, 3, to distingush between different terms
			YS	Start year	Year the region commences production
			ML	Mine Production Low	Max production of mines in the early years of mining
			MH	Mine Production High	Max production of mines that is expected in the final years of mining
			LL	Mine Life Low	Operating life of mines in the early years of mining
			LH	Mine Life High	Operating life of mines in the final years of mining
			tt	Mine time constant	Year mine lifes and production rates are at the midpoint between the low and high values
			rt	Mine rate constant	Rate at which mines change from early style in late style
			rQT	Minesonline rate	Rate constant that controls the speed to which new mines are brought online in the region
			NA	ramp up time	Number of years needed for mines to reach maximum production and to cease production at the end
			NA	Min upgrade time	Min upgrade time, minimum number of operating years the mine has to allow it to be upgraded
			QT	URR	URR - the ultimately recoverable resource, aka area under the output graphs.
									Mine - Optional inputs
				if not desired type NA or leave blank
			NA	Max Capacity	Maximum capacity for the region (aka region constrained by some outside factor)
			NA	Year dynamics changes	Year that something happens to change the situation in the region
			NA	new minesonline rate	New rate constant that controls the speed to which new mines are brought online in the region
			NA	new maximum capacity	New maximum capacity after the dynamics have changed
			DS	Disruption start year	Disruption start year - the year a short term disruption occurs in
			Df	Disruption end year	Disruption end year - the year the short term disruption ends in
			DS	Disruption reduction	Disruption reduction - the scale of the disruption, note, numbers greater than one are allowable and valid.
				Space is provided for 5 disruptions, it is unlikely you will need more, but if you do, simply add more in that particular row
									Field - Necessary inputs
			Symbol	Term	Description
			NA	Continent	The relevant continent for the individual item, e.g. Asia
			NA	Country	The relevant country for the individual item, e.g. Australia
			NA	Region	The relevant region for the individual term, e.g. NSW
			NA	Mineral	The geological resource being examined e.g. Coal
			NA	Type	The subtype of resource e.g. Bituminous
			NA	Number	The number of the item, use 1, 2, 3, to distingush between different terms
			YS	Start year	Year the region commences production
			1/rF	when parity	Inverse of the rate constant that affects the fraction of fields online relative to fractional cum. Prod. Must be <1
			NA	ramp up time	Number of years it takes the field to reach maximum production should be 1
			˜FP	URRtor0	Fields maximum production reached expressed as a fraction of the URR of the field
			˜Qr	URRtoURRr	URR remaining in the field, when the field begins to decline
			rQ	powernum	Rate constant linking fraction of fields to fraction of URR exploitable (0.35 is justified)
			NA	Max field size	Maximum possible size of a field 17 EJ for oil, 13 EJ for gas is realistic
			ΣnFT	how many fields	Total number of fields in all the OGREs
			nRT	how many OGREs	Total number of Oil or Gas Regions (OGREs)
			rε	OGRE rate	Rate constant that controls the number of OGREs that are online
			QT	URR	Ultimately Recoverable Resources (URR), area under the output graphs.
									Field - Optional inputs
				if not desired type NA or leave blank
			NA	Max Capacity	Maximum capacity for the region (aka region constrained by some outside factor)
			NA	Year dynamics changes	Year that something happens to change the situation in the region
			NA	new when parity	New rate at which fields come online after the dynamics have changed (must be less than 1)
			NA	new maximum capacity	New maximum capacity after the dynamics have changed
			DS	Disruption start year	Disruption start year - the year a short term disruption occurs in
			Df	Disruption end year	Disruption end year - the year the short term disruption ends in
			DS	Disruption reduction	Disruption reduction - the scale of the disruption, note, numbers greater than one are allowable and valid.
				Space is provided for 5 disruptions, it is unlikely you will need more, but if you do, simply add more in that particular row
									Ammendments
				A constant pc was accidentally excluded from the description in the thesis, the population equation in 3.6.1 should have been:
				Where pc was set at 1.5
				Recycle - unnecessary for the thesis was added to the model to allow for greater useability of the model, and is calculated by:
				where, s(t) is total supply, Lu is the life of the useable product, RL is the initial recycling rate, RH is the ultimate recycling rate,
				rR is the rate constant that controls the speed at which the recycle rate increases, and tR is the time constant and is the year recycling
				is half way between RL and RH.
				A detailed description of the model is found in Steve Mohr's thesis:
				http://www.theoildrum.com/node/6782

## Sheet: General_Info
		Scenario Name:		Spaces are not allowed
		Units (Y axis):

## Sheet: Interaction
			Shutoffpercent (for fields):		0.01 is standard and means that the field is shut off when production reaches 1% of it's maximum production levels
			Time delay:		Delays the start of the model by that inputted number of years (warning this was considered important to have in initial versions but subsquently ignored as unnecessary believed to still work but may cause bugs)
			initial Demand:		The percapita demand when the model commences (i.e. the first year a mine or field is brought online)
			kD:		The rate at which the percapita demand is rising
			Max Demand:		Maximum per capita demand.
			k1:		This is the interaction term that controls demand switch to 0 if wish supply to not influence demand
			k2:		This is the interaction term that influences the number of fields online, switch to 0 if no influence
			k3:		This is the interaction term that inluences the number of mines online, switch to 0 if no influence
			k4:		This is the interaction term that inluences how many OGREs are online (OGRE = Oil or Gas Region), switch to 0 if no influence
			whenfields:		This is the minimum gap between supply and demand (expressed as a fraction) needed to influence the number of OGREs online. Switch to 0 if no influence
			k5:		This is the interaction term that influences the upgrades of mines. Switch to 0 if no influence
			whenupgrads:		This is the minimum gap between supply and demand (expressed as a fraction) needed to influence the upgrading of mines. Switch to 0 if no influence
			Gapdelay:		This is the number of years before the supply and demand interactions are switched on. (if set to 0 severe instability will result).
			Maxpop:		pH The maximum population of the region (in billions)
			Popinit:		pL The initial population of the region (in billions)
			poprate:		rm The rate constant for the population
			popmidyear:		tm Time constant needed for the population calculations.
			popB:		pc The population constant (set to 1 for symmetry)
			popGamma		γmThe population asymmetry constant (set to 1 for symmetry)
			Life of product:		The life of the end use product of the resource (needed for recycling determinations)
			minrecycled:		The initial recyclying rate for the end use product
			Maxrecycled:		The final recycling rate for the end use product
			Raterecycle:		The rate at which the recycling uptake is increasing
			midyear:		The year the recycling is half way between the initial and final recycling rates

## Sheet: Mine
		Continent	Country	Region	Mineral	type	number	Start Year	Mine Prod. Low	Mine Prod High	Mine Life Low	Mine Life High	Mine time constant	Mine rate constant	Minesonline rate	rampup time	Min upgrade time	URR	Max capacity	Year dynamic changes	new minesonline rate	new max capacity	Disruption Start	Disruption End	Disruption reduction	Disruption Start	Disruption End	Disruption reduction	Disruption Start	Disruption End	Disruption reduction	Disruption Start	Disruption End	Disruption reduction	Disruption Start	Disruption End	Disruption reduction

## Sheet: Field
		Continent	Country	Region	Mineral	type	Number	Start year	when parity	ramp up time	URRtor0	URRtoURRr	powernum	Max field size	how many fields	how many OGREs	OGRE rate	URR	Max Capacity	Year dynamics changes	new when parity	new maximum capacity	Disruption start year	Disruption end year	Disruption reduction	Disruption start year	Disruption end year	Disruption reduction	Disruption start year	Disruption end year	Disruption reduction	Disruption start year	Disruption end year	Disruption reduction	Disruption start year	Disruption end year	Disruption reduction
